# Supplementary material for: LGR5 Expression Predicting Poor Prognosis Is Negatively Correlated with WNT5A in Colon Cancer
Source: MDPI journal article supplement (doi:10.3390/cells12222658), 2023-11-20
Supplement: s1 [file s1]

## Supplementary Information

# **LGR5 expression predicting poor prognosis is negatively correlated with WNT5A in colon cancer**

**Lubna M. Mehdawi <sup>†,\*</sup>, Souvik Ghatak<sup>†</sup>, Payel Chakraborty, Anita Sjölander and Tommy Andersson<sup>\*</sup>**

Cell and Experimental Pathology, Department of Translational Medicine, Lund University, Skåne University Hospital, Malmö, Sweden.

<sup>\*</sup> Correspondence: [tommy.andersson@med.lu.se](mailto:tommy.andersson@med.lu.se) (T.A.); [lubna.mehdawi@med.lu.se](mailto:lubna.mehdawi@med.lu.se) (L.M.)

<sup>†</sup> These authors contributed equally to this study.

## Malmö-CC - cohort

**A**

**WNT5A + significant clinical factors**

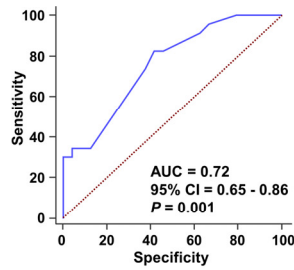

**B**

**LGR5 + significant clinical factors**

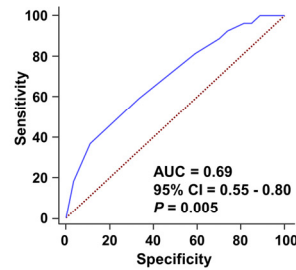

## TCGA-COAD - cohort

**C**

**WNT5A**

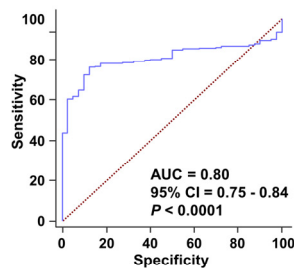

**D**

**LGR5**

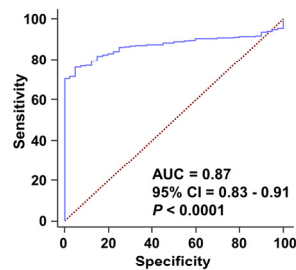

**E**

**Malmö-CC - cohort**

**DCLK1 + significant clinical factors**

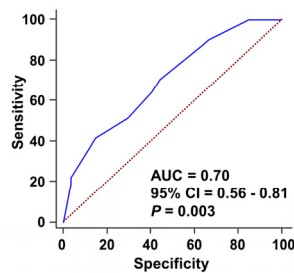

**F**

**TCGA-COAD - cohort**

**DCLK1**

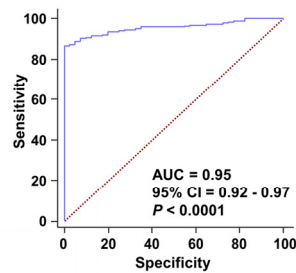

**Figure S1.** ROC curves to determine the predictive ability of (A) WNT5A, (B) LGR5, and (E) DCLK1 expression in the Malmö-CC cohort and (C) WNT5A, (D) LGR5, and (F) DCLK1 in the TCGA-COAD cohort.

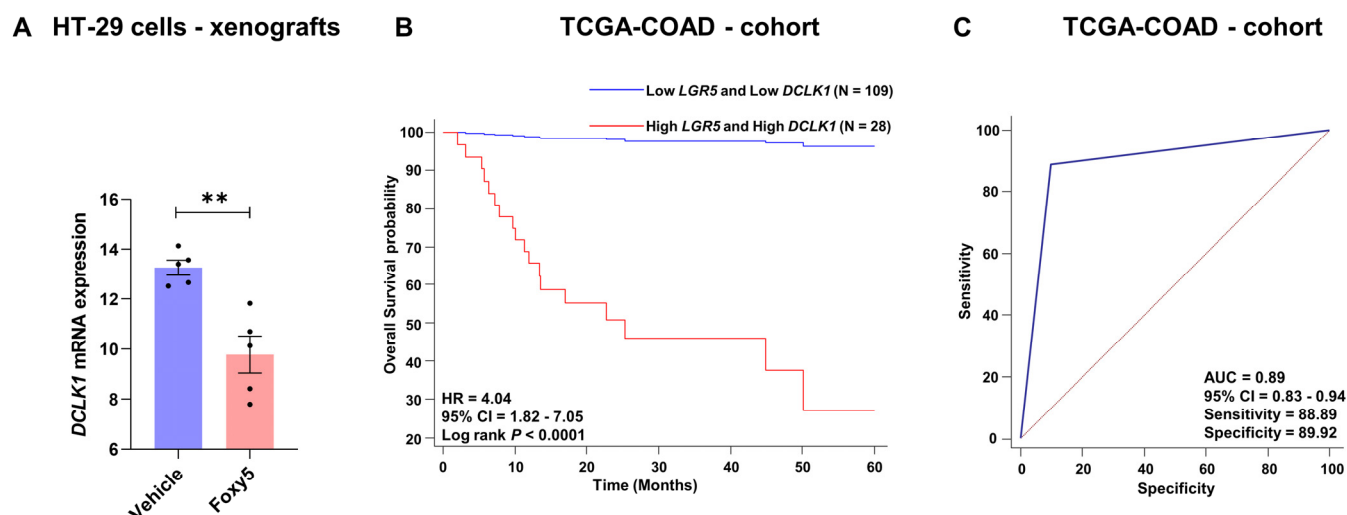

**Figure S2.** (A) *DCLK1* mRNA levels in HT-29 colon cancer tissues from xenograft mice treated with vehicle or Foxy5 (2 µg/g) every other day for a 14-day period. The results are shown as the mean ± SEM; \*\*P > 0.01, analyzed with paired Student's t test. (B) Five-year overall survival analysis of two patient groups from the TCGA-COAD cohort based on the combinations of *LGR5* and *DCLK1* mRNA expressions. (C) A ROC curve to determine the predictive ability of the combination of *LGR5* and *DCLK1* expression levels in the TCGA-COAD cohort.

**Table S1.** The clinicopathological parameters of the patients included in the Malmö-CC cohort at their time of diagnosis. The univariate Cox-PH survival analysis was performed for the listed clinicopathological parameters. However, a univariate Cox-PH analysis was not performed in the T1 to T4 group due to only 1 sample in the T4 group. Instead, we performed a univariate Cox-PH analysis between the low aggressiveness group (T1 + T2) and the high aggressiveness group (T3 and T4).

| Clinicopathological parameters | Patients (n = 72) | Percentage (%) | HR (95% CI)       | P value  |
|--------------------------------|-------------------|----------------|-------------------|----------|
| <b>Sex</b>                     |                   |                |                   |          |
| Male                           | 39                | 54.16          | 2.00 (1.10–3.61)  | 0.024    |
| Female                         | 33                | 45.83          |                   |          |
| <b>Age (75 ± 9.94)</b>         |                   |                |                   |          |
| < 75                           | 33                | 45.83          | 0.99 (0.96–1.03)  | 0.960    |
| ≥ 75                           | 39                | 54.16          |                   |          |
| <b>Pathological stage</b>      |                   |                |                   |          |
| Stage I                        | 9                 | 12.50          | 2.72 (1.85–4.01)  | < 0.0001 |
| Stage II                       | 28                | 38.88          |                   |          |
| Stage III                      | 21                | 29.16          |                   |          |
| Stage IV                       | 14                | 19.44          |                   |          |
| <b>T Group</b>                 |                   |                |                   |          |
| T1                             | 3                 | 4.16           | NA*               | NA       |
| T2                             | 9                 | 12.50          |                   |          |
| T3                             | 59                | 81.94          |                   |          |
| T4                             | 1                 | 1.38           |                   |          |
| <b>T Group</b>                 |                   |                |                   |          |
| T1 and T2                      | 12                | 16.66          | 2.37 (0.85–6.60)  | 0.100    |
| T3 and T4                      | 60                | 83.33          |                   |          |
| <b>Lymph node metastasis</b>   |                   |                |                   |          |
| N0                             | 40                | 55.55          | 2.28 (1.61–3.24)  | < 0.0001 |
| N1                             | 27                | 37.50          |                   |          |
| N2                             | 2                 | 2.77           |                   |          |
| N3                             | 3                 | 4.16           |                   |          |
| <b>Metastasis</b>              |                   |                |                   |          |
| M0                             | 58                | 80.55          | 6.09 (3.00–12.35) | < 0.0001 |
| M1                             | 14                | 19.44          |                   |          |
| <b>Tumor size</b>              |                   |                |                   |          |
| 0-2 cm                         | 2                 | 2.77           | 2.84 (0.48–5.37)  | 0.083    |
| 2-5 cm                         | 10                | 13.88          |                   |          |
| 5-10 cm                        | 46                | 63.88          |                   |          |
| >10 cm                         | 9                 | 12.50          |                   |          |
| Missing                        | 4                 | 5.55           |                   |          |
| <b>Tumor differentiation</b>   |                   |                |                   |          |
| Poor                           | 2                 | 2.77           | 0.93 (0.51–1.68)  | 0.821    |
| Moderate                       | 50                | 69.44          |                   |          |
| High                           | 20                | 27.77          |                   |          |

NA\* = Not Applicable; HR – Hazard Ratio; CI – Confidence Interval.
